# Supplementary material for: Rapid and highly sensitive detection of Salmonella typhimurium in lettuce by using magnetic fluorescent nanoparticles
Source: Royal Society of Chemistry journal article supplement (doi:10.1039/d0ay01744b), 2020-01-01
Supplement: d0ay01744b1.pdf [file d0ay01744b1.pdf]

## Supporting Information

### **Rapid and highly sensitive detection of *Salmonella Typhimurium* in lettuce by using magnetic fluorescent nanoparticles**

Ziang Guo, Xiaowei Huang\*, Zhihua Li, Jiyong Shi\*, Xiaodong Zhai, Xuetao Hu,

Nini Liang, Xiaobo Zou\*.

School of Food and Biological Engineering, Jiangsu University, Zhenjiang 212013,

China

\*Corresponding author:

Prof. Xiaobo Zou

Xiaowei Huang

Prof. Jiyong Shi

E-mail: [zou\\_xiaobo@ujs.edu.cn](mailto:zou_xiaobo@ujs.edu.cn)

[huangxiaowei@ujs.edu.cn](mailto:huangxiaowei@ujs.edu.cn)

[shi\\_jiyong@ujs.edu.cn](mailto:shi_jiyong@ujs.edu.cn)

Figure S1

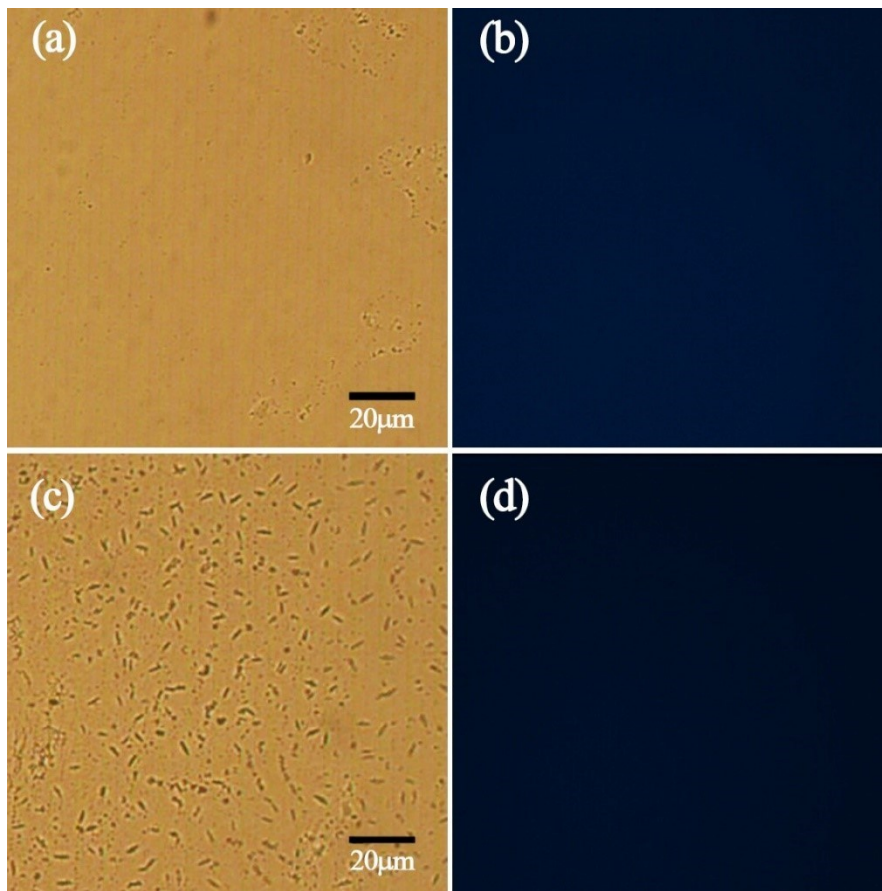

Figure S1 Microscopic image of the FMNCs-Apt incubated with *Salmonella*

*Typhimurium* ((a), (b): $10\text{ cfu}\cdot\text{mL}^{-1}$ , (c), (d): $10^7\text{ cfu}\cdot\text{mL}^{-1}$ )

Figure S2

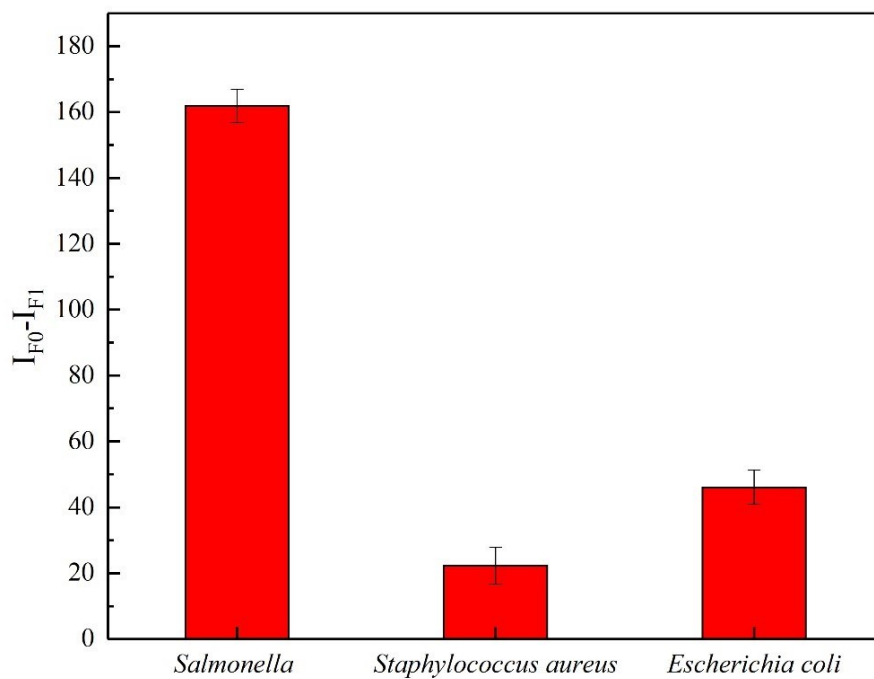

Figure S2 Fluorescence intensity changes of FMNCs (100  $\mu\text{g}$ ) of different kind of bacteria (A: *Salmonella Typhimurium*, B: *Staphylococcus aureus* C: *Escherichia coli*)
